## **A quantitative analysis of objective feather colour assessment: measurements in the lab are more reliable than in the field**

Iker Vaquero-Alba<sup>1,3</sup>, Andrew McGowan<sup>1</sup>, Daniel Pincheira-Donoso<sup>2</sup>, Matthew R. Evans<sup>1</sup>‡ and  
Sasha R.X. Dall<sup>1</sup>

<sup>1</sup>*Centre for Ecology and Conservation (CEC), Daphne du Maurier, College of Life and Environmental  
Sciences, University of Exeter, Cornwall Campus, Penryn, Cornwall, TR10 9FE, UK*

<sup>2</sup>*Laboratory of Evolutionary Ecology of Adaptations, School of Life Sciences, College of Science, University  
of Lincoln, Brayford Campus, Lincoln, Lincolnshire, LN6 7DL, UK*

<sup>3</sup>Correspondence author. E-mail: [karraspito@yahoo.es](mailto:karraspito@yahoo.es)

‡Present address: School of Biological and Chemical Sciences, Fogg Building, Queen Mary, University of  
London, Mile End Road, London, E1 4NS, UK

Word count: 5553

1     **Abstract**

2     The evolution of animal colouration is importantly driven by sexual selection operating on traits used to  
3     transmit information to rivals and potential mates, which therefore, have major impacts on fitness.  
4     Reflectance spectrometry has become a standard colour-measuring tool, especially after the discovery of  
5     tetrachromacy in birds and their ability to detect UV. Birds' plumage patterns may be invisible to humans,  
6     necessitating a reliable and objective way of assessing colouration not dependent on human vision.  
7     Plumage colouration measurements can be taken directly on live birds in the field or in the lab (e.g. on  
8     collected feathers). Therefore, it is essential to determine which sampling method yields more repeatable  
9     and reliable measures, and which of the available quantitative approaches best assess the repeatability of  
10    these measures. Using a spectrophotometer, we measured melanin-based colouration in barn swallows'  
11    (*Hirundo rustica*) plumage. We assessed the repeatability of measures obtained with both traditional  
12    sampling methods separately to quantitatively determine their reliability. We used the ANOVA-based  
13    method for calculating the repeatability of measurements from two years separately, and the GLMM-  
14    based method to calculate overall adjusted repeatabilities for both years. We repeated the assessment for  
15    the whole reflectance spectrum range and only the human-visible part, to assess the influence of the UV  
16    component on the reliabilities of sampling methodologies. Our results reveal very high repeatability for lab  
17    measurements and a lower, still moderate to high repeatability, for field measurements. Both increased  
18    when limited to only the human-visible part, for all plumage patches except the throat, where we observed  
19    the opposite trend. Repeatability between sampling methods was quite low including the whole spectrum,  
20    but moderate including only the human-visible part. Our results suggest higher reliability for  
21    measurements in the lab and higher power and accuracy of the GLMM-based method. They also suggest  
22    UV reflectance differences amongst different plumage patches.

23    **Key words:** Adjusted repeatability, bird plumage, colourful displays, sexual selection,  
24    spectrophotometry, tetrachromacy, ultraviolet.

25

26

27

28

29

30

31

32

## 33 **Introduction**

34 Colour vision involves the capacity to discriminate amongst different wavelengths of light, independent  
35 of their intensity [1,2]. Although colouration traits expressed in animals have proven essential components  
36 to understand the nature of selection, sexual selection in particular, only relatively recently have scientists  
37 appreciated the importance of a systematic understanding of both function and evolution of colouration, as  
38 well as the mechanisms that underpin it [3]. Birds in particular, due to their colourful displays and the role  
39 of their colour signals in fitness differentials, have traditionally been employed as prime model systems to  
40 understand the causes and implications of colour evolution. However, the mechanisms of colour vision  
41 and spectral information processing needed to understand how birds perceive colours remain areas with  
42 more questions than answers.

43 Mate choice theory predicts that elaborately ornamented males can provide female birds with direct (if  
44 ornamental traits reflect individual condition, useful individual attributes or somatic quality independent of  
45 condition) and/or indirect fitness benefits ('good genes' or attractiveness for offspring – as conspicuous  
46 and costly male traits indicate highly heritable viability) [4-6]. Therefore, birds with more elaborate colourful  
47 displays are expected to enjoy a selective advantage given their higher mating chances [4,7].

48 Given the paramount significance of studies of bird plumage colouration in behavioural and evolutionary  
49 ecology, methods for reliably and objectively quantifying such colouration are critical. Methods traditionally  
50 used for colour assessment include colour ranks on an arbitrary scale [8], tristimulus colour models based  
51 on human vision, such as the Munsell system [9,10], reference colour swatches [11], or digital  
52 photography [12-14]. However, although all these methods offer simple and affordable ways of colour  
53 measurements in different analytical settings, they lack reliability and objectivity [15], as they are tuned to  
54 the human visual system instead of the bird visual system.

55 Birds do not perceive colours in the same way as humans [16]. Birds have evolved a fourth cone type in  
56 their eyes, with a pigment that is sensitive to ultraviolet light. And although we are still far from  
57 understanding exactly how colours are perceived by birds [3], progress is being made towards  
58 understanding how colour vision works in general and how spectral information is processed by birds and  
59 other non-human animals [2,17,18]. Methods have been developed for comparing colour patterns as birds  
60 see them, using known properties of bird eyes and generating detailed formal descriptions of colour  
61 spaces and the equations used to plot them [19].

62 Since the 1990s, a wide range of further methods for analyzing spectrophotometry data have emerged  
63 [3]. This development stems largely from the revival of interest in UV vision and tetrachromacy in birds  
64 and the fact that birds can see colours that humans cannot experience [20,21]. This raises the possibility

65 of the existence of plumage patterns invisible to the human eye, and mate choice behaviours based on  
66 the ultraviolet part of the bird reflectance spectrum have been discovered [22,23]. Therefore, reliable and  
67 objective ways of quantifying bird coloration, not dependent on human vision, are at a premium. Miniature  
68 diode-array spectroradiometer systems, lighter, more portable and affordable than previous spectrometry  
69 systems but as precise and objective in colour quantification, have provided popular tools for colour  
70 communication studies [3].

71 Two traditional ways of assessing bird plumage colouration with spectrophotometers have been  
72 reported in the literature. Measurements may be taken directly on the bird, applying the pointer of the  
73 spectrophotometer to plumage patches as they occur *in situ* [24-29]. Alternatively, measurements may be  
74 taken in the lab, with feather samples collected from the field, applying the pointer (the cone-shaped piece  
75 of black plastic on top of the probe used to direct the light from the source in a given angle) to “plumage  
76 patches” created by mounting these feathers on a flat surface in a way that mimics the original plumage  
77 structure [30-38]. Despite the popularity of the use of spectrophotometers for colour assessment and the  
78 growing number of studies on bird colouration, few studies have rigorously assessed the consistency of  
79 both methods for measuring the colouration of plumage patches, and the repeatability of results obtained  
80 when using either one or the other (see [39] for a comparison of carotenoid-based plumage coloration in  
81 great tits).

82 Additionally, there is little consensus on how to best quantify the reliability, or repeatability, of spectral  
83 measurements. The most common measure of repeatability, or more precisely, the coefficient of intraclass  
84 correlation ( $r_i$ ), can be formally defined as the proportion of the total variance explained by differences  
85 among groups [40,41]:

86

$$87 \quad r_i = \sigma_a^2 / (\sigma_a^2 + \sigma_e^2) \quad (\text{eqn 1})$$

88

89 where  $\sigma_a^2$  is the between-group variance and  $\sigma_e^2$  the within-group variance, whereas the sum of both  
90 comprises the total phenotypic variance [41]. Until recently, the most common ways to estimate  
91 repeatabilities from data with Gaussian errors have employed the correlation-based method [40] or the  
92 ANOVA-based method, commonly used by behavioural and evolutionary ecologists [42,43]. However,  
93 Nakagawa and Schielzeth [41] developed an innovative R-based function for calculating GLMM-based  
94 repeatability estimates, which allows for confounding variables to be factored out and calculates the  
95 confidence intervals for each repeatability calculation, inferred from distributions of repeatabilities obtained  
96 by parametric bootstrapping.

97 Our aim is twofold. We first compare two different methods for measuring melanin-based plumage  
98 ornamentation to determine which one allows to obtain more repeatable and reliable measures. The  
99 methods consist in measuring the feather colouration either directly on the bird in the field or on feather  
100 samples in the laboratory. We then compare two statistical methods to assess repeatability, one ANOVA-  
101 based and another one GLMM-based, and determine the pros and cons of each of them. We hypothesize  
102 that measuring feather colouration in the lab will yield more repeatable and reliable measures, as it avoids  
103 the logistic, technical and animal welfare limitations imposed by the field method and provides more  
104 controlled conditions during the measurements. Also, we predict more realistic and accurate repeatability  
105 estimates with the GLMM-based statistical method, as it allows us to introduce more sources of variation  
106 in each analysis. We use the European barn swallow *Hirundo rustica* as a model species. To the best of  
107 our knowledge, this is the first time GLMM-based repeatability estimates have been used to assess the  
108 reliability of melanin-based plumage colouration measurements.

109

## 110 **Methods**

### 111 **Field work and data collection**

112 Field work was carried out during May-August 2009 and March-August 2010 in multiple sites, mostly  
113 farmlands, around the Falmouth area in Cornwall, UK. A total of 59 adult European barn swallows (21 in  
114 2009 and 38 in 2010), were caught using mist nets, ringed, morphometric measurements taken, plumage  
115 reflectance spectra quantified in the field and feather samples collected for subsequent assessment in the  
116 lab.

117 Colour was quantified based on Endler and Mielke's [19] approach, using a USB2000  
118 spectrophotometer (Ocean Optics, Dunedin, Florida), and a xenon flash lamp (Ocean Optics). Before  
119 using the spectrophotometer, we calibrated it by setting the white and black references, i.e., we "told" the  
120 machine which colour we want to be considered as the 100% reflectance (white) standard, and the 0%  
121 reflectance (dark) standard, so that the rest of the colour measurements are determined in relation to  
122 those maximum and minimum possible reflectance values. We used a WS-1 SS Diffuse Reflectance  
123 Standard, a diffuse white plastic >98% reflective from 250-1500 nm, as the white reference (100%  
124 reflectance), and a piece of black velvet as the dark standard (0% reflectance) to correct for the noise  
125 when no light is reaching the sensor. At the far end of the reflection probe/light source, we put a non-  
126 reflective black pointer cut in a 45 degree angle, to avoid mismeasurement derived from the white light  
127 directly reflected by the plumage reaching the sensor [15]. Using the spectra acquisition software package  
128 OOIBase (Ocean Optics), we measured the reflectance of four body regions, namely the throat, breast,

129 belly and vent of each bird. For the measurements of feather samples in the lab, we collected enough  
130 feathers from live birds as to being able to mount them one on top of the other and simulate the original  
131 pattern found on live birds. We mounted the feathers on a piece of black velvet to avoid background noise.  
132 Once we had tested for the reliability of the measures obtained with both sampling methods separately,  
133 we averaged the three measurements for each method and used these average values to test the  
134 comparability between field and lab measurements.

135 We also used Endler and Mielke's [19] method to calculate brightness, chroma and hue, parameters  
136 generally used to specify a colour. Using their equations and the mathematical software Matlab (The  
137 MathWorks Inc., Natick, MA), we got the spectral sensitivity functions of the cones corrected for the cut  
138 points of oil droplets, calculated the quantal catch for each photoreceptor and converted those quantal  
139 catches into dimensional colour space coordinates in a tetrahedral colour space (Fig. 1). Chroma is  
140 defined as the strength of the colour signal or the degree of difference in stimulation among the cones,  
141 and it is proportional to the Euclidean distance from the origin, that is, the distance from the bird grey  
142 (achromatic) point to each point, specified by three space coordinates. Perception of hue depends of  
143 which cones are stimulated, and in tetrahedral colour space, it is defined by the angle that a point makes  
144 with the origin. As bird colour space is 3D, hue is defined by two angles, analogous to latitude and  
145 longitude in geography [19].

146 Brightness is defined as the summed mean reflectance across the entire spectral range ( $R_{300-700}$ ;  
147 [44,45]). As well as these parameters, we included UV chroma, a measure of spectral purity, into our  
148 analysis, which was calculated as the proportion of reflectance in the UV part of the spectrum ( $R_{300-400}$ ) in  
149 relation to the total reflectance spectrum ( $R_{300-700}$ ; [46]). Cone sensitivities and oil droplet cut points were  
150 taken from Bowmaker et al. [16], Hart [47], Vorobyev et al. [48], Govardovskii et al. [49], and Hart and  
151 Vorobyev [50].

152 Although all the avian families investigated show plumages reflecting significant amounts of UV light  
153 (see [51] for a review), in the particular case of barn swallows, ventral plumage shows a noisy reflectance  
154 pattern in the UV part of the spectrum and does not exhibit a clear ultraviolet reflectance peak (Fig. 2;  
155 [34]). For this reason, we calculated the same colour variables both including and not including the UV  
156 part of the reflectance spectrum, and carried out a repeatability assessment using either the whole  
157 reflectance spectrum (300-700 nm) or only the human-visible part (400-700 nm). When using only the  
158 visible part, we did not include UV chroma, for obvious reasons, nor hue, as values are identical in both  
159 cases.

160 Due to the way data were collected, the three plumage colouration measurements taken in the field in  
161 2009 covered a wider area of each plumage patch than the measurements made on feather samples,  
162 which were restricted to the area covered by the bunch of feathers plucked from each patch on each  
163 individual. In 2010, however, the three field measurements were taken approximately in the same  
164 plumage area for each patch.

165

#### 166 **ANOVA-based method**

167 In order to test for the reliability of both sampling procedures (described above) separately, we  
168 calculated the repeatability for colour variables in the four patches for the different procedures according  
169 to Lessells and Boag [43], Senar [52] and Quesada and Senar [39]. Repeatabilities were computed from  
170 the mean squares of ANOVA on three repeated measures per individual. Both in field and lab procedures,  
171 the second and third measurements were made after removing the reflection probe/light source and the  
172 black pointer on top of it and placing it again on the colouration patch. IV took all the measurements.

173 Once we calculated the “within-method” repeatabilities, i.e., the repeatabilities for each sampling  
174 method, we averaged the three measurements per patch per individual and assessed the “between-  
175 method” repeatability, i.e. the repeatability of measurements across procedures, but this time the ANOVA  
176 was carried out on two repeated measures per individual, one from the field and another one from the lab.  
177 We repeated this process for both 2009 and 2010 data separately.

178

#### 179 **GLMM-based method**

180 We used a modified version of the R function *R.Anson*, which is itself a modification of *rpt.remILMM*  
181 function [41]. We fitted two random-effect terms (individual identity and year) in our linear mixed-effects  
182 models, and calculated the adjusted repeatability estimate as:

183

$$184 \quad r_i = \sigma_a^2 / (\sigma_a^2 + \sigma_e^2 + \sigma_r^2) \quad (\text{eqn 2})$$

185

186 where  $\sigma_r^2$  is the year variance.

187 In order to have a general idea of repeatability for each patch, we included all the colour variables in a  
188 principal component analysis (PCA) and calculated the repeatability (and confidence intervals) for the first  
189 component (PC1) within each plumage patch.

190

191 As we conducted multiple statistical tests on data subsets that are not likely to be biologically  
192 independent of each other (i.e. different components of the spectra, same metrics on different years, or  
193 same metrics in the lab and in the field), there was an increased probability of type I error rates. To control  
194 for this increased probability, we corrected our p-values for multiple testing based on the sequentially  
195 rejective Bonferroni procedure of Holm [53], using the *p.adjust* function from the *stats* package in R [54].  
196 All the statistical analyses were carried out using R [54,55].

197

## 198 **Ethics Statement**

199 AMcG and MRE had a Home licence which covered taking feather samples as well as other activities  
200 (Home Office Project Licence Number 30/2740). MRE was the project licence holder.

201 All work was carried out on private residencies and farms with the express permission of the landowners  
202 in question. Contact details of the landowners can be provided by the authors upon request and after  
203 asking the landowners for permission, in order to respect their privacy.

204 Our field study did not involve any endangered or protected species. The specific locations of the study  
205 are provided as supporting material.

206 Birds were caught using mist nets under licence (AMcG BTO A licence Holder No.4947).

207

## 208 **Results**

### 209 **ANOVA analyses**

210 In 2009, when including the whole spectrum in the analyses, measuring plumage colouration in the lab  
211 proved to be a reliable method. Brightness, UV chroma, chroma and hue latitude and longitude being  
212 highly repeatable for all the patches, and hue latitude in the throat being less repeatable ( $r_i=0.418$ ,  
213  $F_{21,44}=3.157$ ,  $P=0.01$ ; Table 1). The method of measuring the plumage colouration in the field (in three  
214 different points, covering a wider area of each patch) was also quite consistent but with overall lower  
215 values of repeatability, although still reasonably high, for all the variables and patches, being especially  
216 low for hue latitude in breast ( $r_i=0.382$ ,  $F_{20,42}=2.856$ ,  $P=0.025$ ) and vent ( $r_i=0.394$ ,  $F_{21,44}=2.955$ ,  $P=0.017$ ;  
217 Table 1).

218 When including only the visible part of the spectrum in the analysis, overall repeatability declined. The  
219 lab method again proved to be the most reliable, with high values of repeatability for brightness and  
220 chroma in all the patches. The field procedure was moderately repeatable for belly and throat, but showed  
221 low repeatability for brightness in the breast ( $r_i=0.36$ ,  $F_{20,42}=2.6885$ ,  $P=0.038$ ) and for chroma in the vent  
222 ( $r_i=0.428$ ,  $F_{21,44}=3.241$ ,  $P=0.007$ ; Table 2).



223 The values of repeatability across the field and laboratory procedures were very low for all the patches  
224 measured, both considering the whole reflectance spectrum or only the visible part ( $r_i < 0.35$  and  $P > 0.05$  in  
225 all cases), suggesting a lack of consistency across the two assessment methods for melanin-based  
226 plumage colouration. Repeatabilities of brightness measurements were slightly higher for the whole  
227 spectrum than for only the visible part, in all the patches except from the vent. However, in this case,  
228 including only the visible part of the spectrum yielded much more repeatable chroma values than including  
229 the whole range, sometimes even turning negative repeatability values into positive, e.g. for the belly  
230 (whole range:  $r_i = -0.507$ ,  $F_{20,21} = 0.327$ ,  $P = 1$ ; only visible range:  $r_i = 0.346$ ,  $F_{20,21} = 2.056$ ,  $P = 0.599$ ), or the vent  
231 (whole range:  $r_i = -0.758$ ,  $F_{21,22} = 0.138$ ,  $P = 1$ ; only visible range:  $r_i = 0.296$ ,  $F_{21,22} = 1.842$ ,  $P = 0.657$ ; Table 1 and  
232 Table 2).

233  
234 In 2010, when including the whole spectrum in the analyses, repeatability measurements in the field  
235 (taken approximately in the same point within each patch) yielded considerably higher results than in  
236 2009, with all the  $r_i$  values above 0.60, except from hue latitude in the throat ( $r_i = 0.515$ ,  $F_{37,75} = 4.186$ ,  
237  $P < 0.0001$ ), and with most of the values ranging from 0.74 to 0.91, except for brightness in the breast  
238 ( $r_i = 0.611$ ,  $F_{37,76} = 5.710$ ,  $P < 0.0001$ ), hue latitude in the belly ( $r_i = 0.63$ ,  $F_{37,76} = 6.1$ ,  $P < 0.0001$ ), hue latitude in  
239 the vent ( $r_i = 0.629$ ,  $F_{37,76} = 6.088$ ,  $P < 0.0001$ ) and hue longitude in the vent ( $r_i = 0.679$ ,  $F_{37,76} = 7.356$ ,  
240  $P < 0.0001$ ). In the lab, repeatability values ranged from 0.71 to 0.95 in most of the patches, except from  
241 hue latitude in the throat ( $r_i = 0.65$ ,  $F_{37,76} = 6.569$ ,  $P < 0.0001$ ), and repeatability was overall higher than when  
242 measuring it on live birds, except from UV chroma in the belly ( $r_i = 0.857$ ,  $F_{37,76} = 18.986$ ,  $P < 0.0001$ ), breast  
243 ( $r_i = 0.788$ ,  $F_{37,76} = 12.117$ ,  $P < 0.0001$ ) and vent ( $r_i = 0.819$ ,  $F_{37,76} = 14.571$ ,  $P < 0.0001$ ) and hue latitude in the  
244 breast ( $r_i = 0.722$ ,  $F_{37,76} = 8.808$ ,  $P < 0.0001$ ), where it was slightly lower. Repeatability values were similar to  
245 the ones obtained in 2009 (Table 3).

246 When doing the analysis including only the visible part of the spectrum, measuring colouration in the lab  
247 was again the most reliable method of both, with all the  $r_i$  values above 0.91, except for chroma in the  
248 throat ( $r_i = 0.881$ ,  $F_{37,76} = 22.964$ ,  $P < 0.0001$ ). Field procedure still yielded high repeatability values, with  
249 brightness in the breast ( $r_i = 0.569$ ,  $F_{37,76} = 4.959$ ,  $P < 0.0001$ ) and chroma in the vent ( $r_i = 0.696$ ,  $F_{37,76} = 7.839$ ,  
250  $P < 0.0001$ ) being the only measurements with values below 0.81. For both methods, repeatability values  
251 were higher than in 2009 for all the variables within all the plumage patches (Table 4).

252 Repeatabilities across field and lab methods in 2010 were quite heterogeneous including the whole  
253 spectrum in the analyses: moderately high for hue longitude in the belly ( $r_i = 0.794$ ,  $F_{37,38} = 8.732$ ,  $P < 0.0001$ )  
254 and breast ( $r_i = 0.657$ ,  $F_{37,38} = 4.818$ ,  $P < 0.0001$ ), moderate for vent hue latitude ( $r_i = 0.463$ ,  $F_{37,38} = 2.723$ ,

255  $P=0.018$ ) and longitude ( $r_i=0.561$ ,  $F_{37,38}=3.553$ ,  $P=0.001$ ), belly hue latitude ( $r_i=0.431$ ,  $F_{37,38}=2.515$ ,  
256  $P=0.034$ ) and breast brightness ( $r_i=0.482$ ,  $F_{37,38}=2.861$ ,  $P=0.012$ ), and low for breast chroma ( $r_i=0.326$ ,  
257  $F_{37,38}=1.966$ ,  $P=0.21$ ), throat UV chroma ( $r_i=0.321$ ,  $F_{37,38}=1.944$ ,  $P=0.312$ ) and chroma ( $r_i=0.274$ ,  
258  $F_{37,38}=1.755$ ,  $P=0.576$ ) and vent brightness ( $r_i=0.349$ ,  $F_{37,38}=2.070$ ,  $P=0.141$ ). For the rest of the cases,  
259 repeatabilities were very low ( $r_i<0.23$  and  $P>0.05$  for all the cases). When including only the visible part of  
260 the spectrum, repeatability was moderate to high and had a significant effect for both brightness and  
261 chroma in the breast, and for chroma in the vent and in the belly, whereas it was quite low and non-  
262 significant for brightness in the belly ( $r_i=0.217$ ,  $F_{37,38}=1.556$ ,  $P=0.899$ ), and very low for both variables in  
263 the throat. Repeatability values for chroma in all the patches except for the throat were much higher than  
264 when we included the whole spectrum range, e.g. in the belly (whole range:  $r_i=-0.049$ .,  $F_{37,38}=0.906$ ,  $P=1$ ;  
265 only visible range:  $r_i=0.75$ ,  $F_{37,38}=7.005$ ,  $P<0.0001$ ) and in the vent (whole range:  $r_i=0.224$ ,  $F_{37,38}=1.579$ ,  
266  $P=0.657$ ; only visible range:  $r_i=0.416$ ,  $F_{37,38}=2.428$ ,  $P=0.047$ ; Table 3 and Table 4).

267

#### 268 **Generalized Linear Mixed Model analyses**

269 When we included the whole spectrum in the analyses, for all the principal component analyses carried  
270 out within each patch for field and lab measurements, PC1 accounted for more than a 53% of the total  
271 variance, except for vent measurements in the field (where it explained a 49% of the total variance) and  
272 for measurements in the throat (where it explained between 44% and 47%). When including only the  
273 visible part of the spectrum, PC1 explained a 67% of the total variance for vent measurements in the field,  
274 and between 75% and 93% in the rest of the cases.

275 Repeatability of feather colour measurements was much higher and confidence intervals smaller when  
276 quantifying colouration from measurements taken in the lab than when doing it on measurements taken on  
277 live birds in the field, both including the whole spectrum in the analyses or only the visible part, being  
278 particularly high in the breast (whole range:  $r_i=0.916$ , 95%CI=0.855, 0.943,  $P<0.0001$ ; visible range:  
279  $r_i=0.927$ , 95%CI=0.872, 0.95,  $P<0.0001$ ). All the repeatability values from lab measurements ranged  
280 between 0.71 and 0.93 and were highly significant ( $P<0.0001$ ).

281 When using field measurements, repeatabilities were still moderately high (all  $r_i$  values above 0.50) and  
282 higher when including only the visible spectrum range in the analyses than including the whole range,  
283 except in the throat (whole range:  $r_i=0.629$ , 95%CI=0.303, 0.874,  $P<0.0001$ ; visible range:  $r_i=0.564$ ,  
284 95%CI=0.266, 0.816,  $P<0.0001$ ; Fig. 3).

285 Repeatabilities across both field and lab methods yielded higher results when we included only the  
286 visible spectrum in the analyses than when we included the whole spectrum. Leaving the values for throat

287 apart, as here repeatability was not significantly different from zero no matter the spectrum range we  
288 included in the analyses,  $r_i$  ranged between 0.19 and 0.41 when including the whole spectrum, and  
289 between 0.44 and 0.62 when including only the visible part (Fig. 3). All the repeatabilities in belly, breast  
290 and vent were significant except for the belly when including the whole spectrum ( $r_i=0.189$ ,  $95\%CI=0$ ,  
291  $0.415$ ,  $P=0.069$ ), but it became significant and higher when only the visible spectrum was included in the  
292 analyses ( $r_i=0.503$ ,  $95\%CI=0.281$ ,  $0.667$ ,  $P<0.0001$ , Fig. 3).

293

## 294 **Discussion**

### 295 **Measuring plumage ornamentation to gain repeatable and reliable measures**

296 Measuring plumage colouration from feather samples in the lab proved to be a highly reliable method,  
297 with high values of repeatability in general for all the variables and patches in 2009, 2010 and when  
298 applying the GLMM-based method for both years. Measurements taken directly on specimens in the field  
299 showed a reasonable extent of reliability, but with overall lower values of repeatability compared to the lab  
300 for most of the variables measured on different patches. As an exception, some variables in the throat in  
301 2009 and UV chroma measurements in the belly, breast and vent in 2010 when considering the whole  
302 spectrum, yielded higher values of repeatability when measured in the field, only when applying the  
303 ANOVA-based method.

304 A potential explanation for our findings is that the throat patch is smaller and much darker than the rest  
305 of the patches. The feathers of the throat patch are also considerably smaller. Therefore, it is often quite  
306 difficult to obtain a reliable reflectance measurement with such a limited amount of photons reaching the  
307 spectrophotometer probe. Also, it is more difficult to create a “plumage patch” in the lab with a feather  
308 arrangement similar to the bird’s original one and big enough to be able to apply the spectrophotometer  
309 pointer to it. An alternative explanation is that the UV part of the spectrum shows a highly noisy pattern,  
310 thus highly consistent UV chroma repeatabilities across field or lab measurements may not necessarily be  
311 expected. This latter alternative may explain why repeatability values in the lab for UV chroma  
312 measurements were higher in the field in 2010, whereas the rest of the repeatability values consistently  
313 tended to be higher in the lab.

314 When applying the GLMM-based method, repeatability was moderate to high within all the patches for  
315 field measurements, whereas it was considerably higher, and the confidence intervals considerably  
316 narrower, for lab measurements. This finding suggests that lab-based measures are more reliable ways of  
317 assessing melanin-based colouration.

318 When comparing both methods, the values obtained in 2009 for different variables measured in different  
319 plumage patches directly on field birds were poorly repeatable compared to the values obtained for the  
320 same variables measured from feather samples in the lab, and non-significant in all cases. In 2010, in  
321 contrast, repeatabilities were higher and significant for certain metrics in certain patches only. These  
322 results stand in marked contrast to the positive results of another study, which compared the  
323 repeatabilities between both colouration assessment procedures for carotenoid-based plumage [39].  
324 There can be several reasons for this difference: for example, due to the different characteristics of the  
325 two types of pigments, carotenoid-derived colouration is more variable among individuals than melanin-  
326 based colouration [56], and repeatability of a character increases with variability [52]. In order to increase  
327 the repeatability of some measurements, a possible solution could be to increase the number of  
328 measurements, for example from three to five, as it has already been done by several authors [22,28,32].  
329 Unfortunately, this is not an option when working with live birds in the field, as we would be increasing the  
330 manipulation times and, consequently, the stress levels to an unacceptable degree, although it can be  
331 applied when assessing colouration in the lab on feather samples [39].

332 As mentioned above, the three plumage colouration measurements taken in the field in 2009 covered a  
333 wider area of each plumage patch than in 2010, when the three field measurements were taken  
334 approximately in the same plumage area for each patch, being this area also the one from which the  
335 majority of feathers for lab measurements were taken. Due to the different ways in which data were  
336 collected in the field each year, repeatability of 2009 field measurements can be taken as an estimate of  
337 colouration consistency within the plumage patches. Our results suggest a moderate to high within-patch  
338 consistency for melanin-based ventral colouration in our model species. The comparability of both  
339 procedures in 2009 may have been compromised, although the repeatability of the 2010 samples was  
340 higher even for lab measurements, especially when considering only the visible part of the spectrum. This  
341 may be indicative of higher patch colouration homogeneity in 2010. Also, the higher lab repeatabilities in  
342 2009 than the field ones could be argued to be a function of field measures being taken over bigger  
343 plumage areas. But the fact that we still get higher lab than field measurements in 2010 suggests practical  
344 limitations to repeatability measurements in the field.

345 Consequently, collecting feathers from birds and assessing their colouration in the lab, as well as being  
346 more convenient, minimising risk to a sensitive device like a spectrophotometer and reducing handling  
347 times of the animals [39], is a more reliable method for assessing melanin plumage colouration than  
348 doing so directly on live birds, according to our results.

349

## 350 **Assessing repeatability**

351 The GLMM-based method [41], applied to data from both years, allowed us to control for year effects by  
352 adding the year variance into the total variance calculation, so that we could obtain the adjusted  
353 repeatability for data from both years. The PCA allowed to create composite variables accounting for  
354 almost 50% of the total variance in the metrics taken from each patch, which therefore, made it possible to  
355 estimate the overall repeatability within each patch for both methods separately and across methods.

356 The possibility of calculating adjusted repeatabilities by including year as a random factor, together with  
357 the reduction in the number of variables accounting for a great proportion of the total variance achieved by  
358 the PCA, considerably reduced the amount of multiple tests necessary for repeatability calculation. Thus,  
359 the p-values obtained with this method were less affected by Bonferroni corrections than those obtained  
360 with the ANOVA-based method, reducing the probability of type II errors and increasing the power of this  
361 repeatability-calculation method.

362 Additionally, this reduction in the number of variables offered us the possibility of getting a general view  
363 of the colour measurement repeatability within each patch. As our variables are all derived from the  
364 reflectance spectra obtained on each colouration patch through the spectrophotometer, comparing the  
365 repeatability of all the different variables within the patches, as well as increasing the probability of type II  
366 errors, can be redundant. The PCA-GLMM combination, in contrast, made it possible to compare the first  
367 principal components within each patch, which can be regarded as whole spectrum estimates, as they  
368 gather a great proportion of the total variance contained in all the variables originally extracted from the  
369 reflectance spectra measurements. And it also allowed us to do so with data from both years.

370 Finally, thanks to the use of the GLMM-based method, we could calculate confidence intervals, useful  
371 indicators of the reliability of our repeatability estimates, additionally to just p-values. That way, and  
372 together with the advantages mentioned above, it was possible to get a more complete and reliable overall  
373 perspective of the question being studied.

374 The fact that almost all the repeatability measurements, and especially the repeatabilities across field  
375 and lab methods (in patches other than the throat), were higher when including only the human-visible  
376 spectrum in the analyses, suggests that the noisy reflectance pattern in the UV part of the spectrum may  
377 be decreasing the repeatability and underestimating the comparability of the two methods. For throat  
378 plumage, however, we observed the opposite trend, with higher repeatability values when including the  
379 whole spectrum, which could be indicative that the UV part of the spectrum is more important in the throat  
380 than in the rest of the patches. We find support for this idea when looking at reflectance spectra plots for  
381 different patches (Fig. 2): throat reflectance spectra, although showing also quite a noisy pattern for the

382 UV part, and unlike the rest of the patches' spectra, tends to show UV reflectance peaks in both sexes.  
383 Further work is needed to find out whether there are UV reflectance differences amongst different  
384 plumage patches.

385

### 386 **Conclusions**

387 Our results suggest that collecting feathers from live animals and assessing colouration in the lab is a  
388 better approach for measuring plumage ornamentation in order to gain repeatable and reliable results  
389 compared to direct measures on live birds in the field. In addition, since it is easier on equipment and  
390 minimises the length of time birds need to be handled (minimising the stress levels inflicted on them),  
391 feather sampling would appear to be the best method available.

392 In addition, from a statistical point of view, our results support the superiority of the GLMM-based method  
393 [41] for repeatability calculation, as it enables random factors to be accounted for and can calculate  
394 adjusted repeatability values, which are more accurate than those calculated using other (e.g., ANOVA)  
395 methods and increase the power of the tests. The reduction in the number of variables gives us a general,  
396 patch by patch overview of the problem being studied, and the confidence intervals allow us to test the  
397 reliability of our own repeatability estimates.

398 Finally, we have also shown that it is important to check for the effect that the UV part of the spectrum  
399 could be exerting on repeatability calculations, as the capability of the plumage to reflect the UV light could  
400 have different biological implications in different plumage patches.

401

402 **Acknowledgements:** Thanks to Mary-Anne Collis, who contributed to establish the farm network, and  
403 Ian Blessley, who extended the network and initially talked to some of the farmers. Our gratitude to  
404 Shinichi Nakagawa, who helped us with the modification of his R function for our purposes. Rebecca  
405 Safran was a huge inspiration for our work. Jon Blount introduced I.V.A. to the use of the  
406 spectrophotometer, and Tom Pike allowed us to use his Matlab spectral data processing equations.  
407 Thanks to Joan Carles Senar for his invaluable help with repeatability-related issues. We are very much  
408 indebted to all the farmers and landlords who granted us access to their properties, their lovely families,  
409 neighbours and pets. Two anonymous reviewers provided helpful comments on a previous version of the  
410 manuscript.

## References

1. Cuthill IC (2006) Color perception. In: Hill GE, McGraw KJ, editors. Bird coloration Mechanisms and measurements Volume 1. Cambridge: Harvard University Press. pp. 3-40.
2. Kelber A, Vorobyev M, Osorio D (2003) Animal colour vision: behavioural tests and physiological concepts. *Biological Reviews* 78: 81-118.
3. Hill GE, McGraw KJ (2006) Bird coloration. Mechanisms and measurements. Volume 1. Cambridge: Harvard University Press.
4. Andersson M (1994) Sexual selection. Princeton: Princeton University Press.
5. Garamszegi LZ, Hegyi G, Heylen D, Ninni P, de Lope F, et al. (2006) The design of complex sexual traits in male barn swallows: associations between signal attributes. *Journal of Evolutionary Biology* 19: 2052-2066.
6. Pomiankowski A (1987) Sexual selection: the handicap principle does work sometimes. *Proceedings of the Royal Society of London B, Biological Sciences* 231: 123-145.
7. Hill GE (2006) Female mate choice for ornamental coloration. In: Hill GE, McGraw KJ, editors. Bird coloration Function and evolution Volume 2. Cambridge: Harvard University Press. pp. 137-200.
8. Promislow DEL, Montgomerie R, Martin TE (1992) Mortality costs of sexual dimorphism in birds. *Proceedings of the Royal Society of London B, Biological Sciences* 250: 143-150.
9. Peiponen VA (1992) Colour discrimination of two passerine bird species in the Munsell system. *Ornis Scandinavica* 23: 143-151.
10. Zuk M, Decruyenaere JG (1994) Measuring individual variation in colour: a comparison of two techniques. *Biological Journal of the Linnean Society* 53: 165-173.
11. Hill GE (1990) Female house finches prefer colourful males: sexual selection for a condition-dependent trait. *Animal Behaviour* 40: 563-572.
12. Loyau A, Saint-Jalme M, Sorci G (2005) Intra- and intersexual selection for multiple traits in the peacock (*Pavo cristatus*). *Ethology* 111: 810-820.
13. Bortolotti GR, Blas J, Negro JJ, Tella JL (2006) A complex plumage pattern as an honest social signal. *Animal Behaviour* 72: 423-430.

14. Stevens M, C.A. P, Cuthill IC, Partridge JC, Troscianko TS (2007) Using digital photography to study animal coloration. *Biological Journal of the Linnean Society* 90: 211-237.
15. Andersson S, Prager M (2006) Quantifying colors. In: Hill GE, McGraw KJ, editors. *Bird coloration Mechanisms and measurements Volume 1*. Cambridge: Harvard University Press. pp. 41-89.
16. Bowmaker JK, Heath LA, Wilkie SE, Hunt DM (1997) Visual pigments and oil droplets from six classes of photoreceptor in the retinas of birds. *Vision Research* 37: 2183-2194.
17. Smith EL, Greenwood VJ, Bennett ATD (2002) Ultraviolet colour perception in European starlings and Japanese quail. *Journal of Experimental Biology* 205: 3299-3306.
18. Kelber A, Osorio D (2010) From spectral information to animal colour vision: experiments and concepts. *Proceedings of the Royal Society of London B, Biological Sciences* 277: 1617-1625.
19. Endler JA, Mielke PWJ (2005) Comparing entire colour patterns as birds see them. *Biological Journal of the Linnean Society* 86: 405-431.
20. Bennett ATD, Cuthill IC, Norris KJ (1994) Sexual selection and the mismeasure of color. *American Naturalist* 144: 848-860.
21. Cuthill IC, Partridge JC, Bennett ATD, Church SC, Hart NS, et al. (2000) Ultraviolet vision in birds. In: Slater PJB, Rosenblatt JS, Snowdon CT, Roper TJ, editors. *Advances in the study of behavior Volume 29*. London: Academic Press. pp. 159-214.
22. Bennett ATD, Cuthill IC, Partridge JC, Lunau K (1997) Ultraviolet plumage colors predict mate preferences in starlings. *Proceedings of the National Academy of Sciences USA* 94: 8618-8621.
23. Maier EJ (1994) Ultraviolet vision in a passeriform bird: from receptor spectral sensitivity to overall spectral sensitivity in *Leiothrix lutea*. *Vision Research* 34: 1415-1418.
24. Senar JC, Figuerola J, Pascual J (2002) Brighter yellow blue tits make better parents. *Proceedings of the Royal Society of London B, Biological Sciences* 269: 257-261.
25. Bize P, Piau R, Moureau B, Heeb P (2006) A UV signal of offspring condition mediates context-dependent parental favouritism. *Proceedings of the Royal Society of London B, Biological Sciences* 273: 2063-2068.



26. Herrera G, Zagal JC, Diaz M, Fernández MJ, Vielma A, et al. (2008) Spectral sensitivities of photoreceptors and their role in colour discrimination in the green-backed firecrown hummingbird (*Sephanoides sephanioides*). *Journal of Comparative Physiology A* 194: 785-794.
27. Catoni C, Peters A, Schaefer HM (2009) Dietary flavonoids enhance conspicuousness of a melanin-based trait in male blackcaps but not of the female homologous trait or of sexually monochromatic traits. *Journal of Evolutionary Biology* 22: 1649-1657.
28. Doucet SM, Hill GE (2009) Do museum specimens accurately represent wild birds? A case study of carotenoid, melanin, and structural colours in long-tailed manakins *Chiroxiptia linearis*. *Journal of Avian Biology* 40: 146-156.
29. Del Cerro S, Merino S, Martínez-de la Puente J, Lobato E, Ruiz-de-Castañeda R, et al. (2010) Carotenoid-based plumage colouration is associated with blood parasite richness and stress protein levels in blue tits (*Cyanistes caeruleus*). *Oecologia* 162: 825-835.
30. Cuthill IC, Bennett ATD, Partridge JC, Maier EJ (1999) Plumage reflectance and the objective assessment of avian sexual dichromatism. *American Naturalist* 153: 183-200.
31. Keyser AJ, Hill GE (2000) Structurally based plumage coloration is an honest signal of quality in male blue grosbeaks. *Behavioral Ecology* 11: 202-209.
32. Perrier C, de Lope F, Møller AP, Ninni P (2002) Structural coloration and sexual selection in the barn swallow *Hirundo rustica*. *Behavioral Ecology* 13: 728-736.
33. McGraw KJ, Safran RJ, Evans MR, Wakamatsu K (2004) European barn swallows use melanin pigments to color their feathers brown. *Behavioral Ecology* 15: 889-891.
34. Safran RJ, McGraw KJ (2004) Plumage coloration, not length or symmetry of tail-streamers, is a sexually selected trait in North American barn swallows. *Behavioral Ecology* 15: 455-461.
35. Komdeur J, Oorebeek M, van Overveld T, Cuthill IC (2005) Mutual ornamentation, age, and reproductive performance in the European starling. *Behavioral Ecology* 16: 805-817.
36. McGraw KJ, Safran RJ, Wakamatsu K (2005) How feather colour reflects its melanin content. *Functional Ecology* 19: 816-821.

37. Safran RJ (2007) Settlement patterns of female barn swallows *Hirundo rustica* across different group sizes: access to colorful males or favored nests? *Behavioral Ecology and Sociobiology* 61: 1359-1368.
38. Vaquero-Alba I (2011) Animal sexual signals: do they maximise or optimise information content? Exeter: University of Exeter.
39. Quesada J, Senar JC (2006) Comparing plumage colour measurements obtained directly from live birds and from collected feathers: the case of the great tit *Parus major*. *Journal of Avian Biology* 37: 609-616.
40. Sokal RR, Rohlf FJ (1995) *Biometry: the principles and practice of statistics in biological research*. California: W. H. Freeman.
41. Nakagawa S, Schielzeth H (2010) Repeatability for Gaussian and non-Gaussian data: a practical guide for biologists. *Biological Reviews* 85: 935-956.
42. Donner A (1986) A review of inference procedures for the intraclass correlation coefficient in the one-way random effects model. *International Statistical Review* 54: 67-82.
43. Lessells CM, Boag PT (1987) Unrepeatable repeatabilities: a common mistake. *Auk* 104: 116-121.
44. Montgomerie R (2006) Analyzing colors. In: Hill GE, McGraw KJ, editors. *Bird coloration Mechanisms and measurements Volume 1*. Cambridge: Harvard University Press. pp. 90-147.
45. Galván I, Møller AP (2009) Different roles of natural and sexual selection on senescence of plumage colour in the barn swallow. *Functional Ecology* 23: 302-309.
46. Siefferman L, Hill GE (2005) Evidence for sexual selection on structural plumage coloration in female eastern bluebirds (*Sialia sialis*). *Evolution* 59: 1819-1828.
47. Hart NS (2001) The visual ecology of avian photoreceptors. *Progress in Retinal and Eye Research* 20: 675-703.
48. Vorobyev M, Osorio D, Bennett ATD, Marshall NJ, Cuthill IC (1998) Tetrachromacy, oil droplets and bird plumage colours. *Journal of Comparative Physiology A* 183: 621-633.
49. Govardovskii VI, Fyhrquist N, Reuter T, Kuzmin DG, Donner K (2000) In search of the visual pigment template. *Visual Neuroscience* 17: 509-528.

50. Hart NS, Vorobyev M (2005) Modelling oil droplet absorption spectra and spectral sensitivities of bird cone photoreceptors. *Journal of Comparative Physiology A* 191: 381-392.
51. Eaton MD, Lanyon SM (2003) The ubiquity of avian ultraviolet plumage reflectance. *Proceedings of the Royal Society of London B, Biological Sciences* 270: 1721-1726.
52. Senar JC (1999) La medición de la repetibilidad y el error de medida. *Etología* 17: 53-64.
53. Holm S (1979) A simple sequentially rejective multiple test procedure. *Scandinavian Journal of Statistics* 6: 65-70.
54. R Development Core Team (2014) R: A language and environment for statistical computing. Vienna: R Foundation for Statistical Computing.
55. Crawley MJ (2007) *The R book*. Sussex: John Wiley & Sons.
56. Badyaev AV, Hill GE (2000) Evolution of sexual dichromatism: contribution of carotenoid- versus melanin-based coloration. *Biological Journal of the Linnean Society* 69: 153-172.

**Table 1:** ANOVA-derived Repeatabilities in 2009 plumage colouration measurements taken from live birds in the field, feather samples in the lab, and across both procedures (UV+Visible spectrum).

|                             | UV+Visible range |                      |          |                      |          |                      |          |                      |
|-----------------------------|------------------|----------------------|----------|----------------------|----------|----------------------|----------|----------------------|
|                             | Belly            |                      | Breast   |                      | Throat   |                      | Vent     |                      |
|                             | <i>F</i>         | <i>r<sub>i</sub></i> | <i>F</i> | <i>r<sub>i</sub></i> | <i>F</i> | <i>r<sub>i</sub></i> | <i>F</i> | <i>r<sub>i</sub></i> |
| <b>Repeatability field</b>  |                  |                      |          |                      |          |                      |          |                      |
| Brightness                  | 6.0446           | <b>0.627***</b>      | 3.1183   | <b>0.414*</b>        | 12.273   | <b>0.79***</b>       | 6.1868   | <b>0.634***</b>      |
| UV Chroma                   | 10.203           | <b>0.754***</b>      | 14.171   | <b>0.814***</b>      | 13.861   | <b>0.811***</b>      | 5.3196   | <b>0.59***</b>       |
| Chroma                      | 9.0161           | <b>0.728***</b>      | 11.238   | <b>0.773***</b>      | 10.714   | <b>0.764***</b>      | 4.5611   | <b>0.543***</b>      |
| Hue latitude                | 4.0921           | <b>0.508***</b>      | 2.8564   | <b>0.382*</b>        | 4.4146   | <b>0.532***</b>      | 2.9545   | <b>0.394*</b>        |
| Hue longitude               | 13.025           | <b>0.8***</b>        | 9.1422   | <b>0.731***</b>      | 24.348   | <b>0.886***</b>      | 4.6771   | <b>0.55***</b>       |
| <b>Repeatability lab</b>    |                  |                      |          |                      |          |                      |          |                      |
| Brightness                  | 13.188           | <b>0.802***</b>      | 14.777   | <b>0.821***</b>      | 8.2092   | <b>0.706***</b>      | 20.212   | <b>0.865***</b>      |
| UV Chroma                   | 46.493           | <b>0.938***</b>      | 23.015   | <b>0.88***</b>       | 34.895   | <b>0.919***</b>      | 25.561   | <b>0.892***</b>      |
| Chroma                      | 42.489           | <b>0.932***</b>      | 26.975   | <b>0.896***</b>      | 62.481   | <b>0.954***</b>      | 29.052   | <b>0.903***</b>      |
| Hue latitude                | 11.986           | <b>0.785***</b>      | 6.5101   | <b>0.647***</b>      | 3.1573   | <b>0.418**</b>       | 23.024   | <b>0.88***</b>       |
| Hue longitude               | 25.986           | <b>0.893***</b>      | 9.2833   | <b>0.734***</b>      | 6.0119   | <b>0.625***</b>      | 27.291   | <b>0.898***</b>      |
| <b>Comparison field-lab</b> |                  |                      |          |                      |          |                      |          |                      |
| Brightness                  | 1.4636           | <b>0.188</b>         | 2.0702   | <b>0.349</b>         | 0.865    | <b>-0.072</b>        | 1.8043   | <b>0.287</b>         |
| UV Chroma                   | 1.3153           | <b>0.136</b>         | 1.3591   | <b>0.152</b>         | 0.7499   | <b>-0.143</b>        | 0.9006   | <b>-0.052</b>        |
| Chroma                      | 0.327            | <b>-0.507</b>        | 1.3715   | <b>0.157</b>         | 1.0143   | <b>0.007</b>         | 0.1376   | <b>-0.758</b>        |
| Hue latitude                | 0.9084           | <b>-0.048</b>        | 0.8635   | <b>-0.073</b>        | 1.2523   | <b>0.112</b>         | 0.706    | <b>-0.172</b>        |
| Hue longitude               | 1.7364           | <b>0.269</b>         | 1.7513   | <b>0.273</b>         | 0.6709   | <b>-0.197</b>        | 1.1055   | <b>0.05</b>          |

\*\*\*\*  $P < 0.001$ ; \*\*\*  $P < 0.01$ ; \*\*  $P < 0.05$ ; \*  $P < 0.1$

**Table 2:** ANOVA-derived Repeatabilities in 2009 plumage colouration measurements taken from live birds in the field, feather samples in the lab, and across both procedures (Only Visible part of the spectrum).

|                             | Visible range |                 |        |                 |        |                 |        |                 |
|-----------------------------|---------------|-----------------|--------|-----------------|--------|-----------------|--------|-----------------|
|                             | Belly         |                 | Breast |                 | Throat |                 | Vent   |                 |
|                             | F             | $r_i$           | F      | $r_i$           | F      | $r_i$           | F      | $r_i$           |
| <b>Repeatability field</b>  |               |                 |        |                 |        |                 |        |                 |
| Brightness                  | 4.8958        | <b>0.565***</b> | 2.6885 | <b>0.36*</b>    | 11.221 | <b>0.773***</b> | 5.6072 | <b>0.606***</b> |
| Chroma                      | 6.7724        | <b>0.658***</b> | 6.4868 | <b>0.646***</b> | 6.6207 | <b>0.652***</b> | 3.2416 | <b>0.428**</b>  |
| <b>Repeatability lab</b>    |               |                 |        |                 |        |                 |        |                 |
| Brightness                  | 11.818        | <b>0.783***</b> | 15.892 | <b>0.832***</b> | 6.9936 | <b>0.666***</b> | 19.326 | <b>0.859***</b> |
| Chroma                      | 28.865        | <b>0.903***</b> | 21.117 | <b>0.821***</b> | 29.402 | <b>0.873***</b> | 23.838 | <b>0.901***</b> |
| <b>Comparison field-lab</b> |               |                 |        |                 |        |                 |        |                 |
| Brightness                  | 1.461         | <b>0.187</b>    | 2.0097 | <b>0.335</b>    | 0.6804 | <b>-0.19</b>    | 1.8902 | <b>0.308</b>    |
| Chroma                      | 2.0563        | <b>0.346</b>    | 1.6683 | <b>0.25</b>     | 1.1396 | <b>0.065</b>    | 1.8415 | <b>0.296</b>    |

\*\*\*\*)  $P < 0.001$ ; \*\*\*)  $P < 0.01$ ; \*\*)  $P < 0.05$ ; \*)  $P < 0.1$ .

**Table 3:** ANOVA-derived repeatabilities in 2010 plumage colouration measurements taken from live birds in the field, feather samples in the lab, and across both procedures (UV+Visible spectrum).

|                             | UV+Visible range |                 |        |                 |               |                 |        |                 |
|-----------------------------|------------------|-----------------|--------|-----------------|---------------|-----------------|--------|-----------------|
|                             | Belly            |                 | Breast |                 | Throat        |                 | Vent   |                 |
|                             | F                | $r_i$           | F      | $r_i$           | F             | $r_i$           | F      | $r_i$           |
| <b>Repeatability field</b>  |                  |                 |        |                 |               |                 |        |                 |
| Brightness                  | 16.422           | <b>0.837***</b> | 5.7104 | <b>0.611***</b> | 17.398        | <b>0.846***</b> | 14.534 | <b>0.819***</b> |
| UV Chroma                   | 25.333           | <b>0.89***</b>  | 15.853 | <b>0.832***</b> | 12.357        | <b>0.791***</b> | 16.829 | <b>0.841***</b> |
| Chroma                      | 24.037           | <b>0.885***</b> | 14.749 | <b>0.821***</b> | 22.212        | <b>0.876***</b> | 12.377 | <b>0.792***</b> |
| Hue latitude                | 6.0997           | <b>0.630***</b> | 9.7411 | <b>0.744***</b> | 4.1857        | <b>0.515***</b> | 6.0878 | <b>0.629***</b> |
| Hue longitude               | 23.669           | <b>0.883***</b> | 31.363 | <b>0.910***</b> | 9.8914        | <b>0.748***</b> | 7.3556 | <b>0.679***</b> |
| <b>Repeatability lab</b>    |                  |                 |        |                 |               |                 |        |                 |
| Brightness                  | 55.197           | <b>0.947***</b> | 31.387 | <b>0.910***</b> | 30.9          | <b>0.909***</b> | 44.036 | <b>0.934***</b> |
| UV Chroma                   | 18.986           | <b>0.857***</b> | 12.117 | <b>0.788***</b> | 17.544        | <b>0.847***</b> | 14.571 | <b>0.819***</b> |
| Chroma                      | 25.375           | <b>0.890***</b> | 25.936 | <b>0.893***</b> | 27.679        | <b>0.899***</b> | 39.854 | <b>0.928***</b> |
| Hue latitude                | 8.3908           | <b>0.711***</b> | 8.8076 | <b>0.722***</b> | 6.5692        | <b>0.650***</b> | 9.1422 | <b>0.731***</b> |
| Hue longitude               | 37.357           | <b>0.924***</b> | 31.683 | <b>0.911***</b> | 11.664        | <b>0.781***</b> | 37.517 | <b>0.924***</b> |
| <b>Comparison field-lab</b> |                  |                 |        |                 |               |                 |        |                 |
| Brightness                  | 1.3041           | <b>0.131948</b> | 2.8612 | <b>0.482*</b>   | 0.7642        | <b>-0.134</b>   | 2.0703 | <b>0.349</b>    |
| UV Chroma                   | 0.5572           | <b>-0.284</b>   | 1.059  | <b>0.029</b>    | 1.9441        | <b>0.321</b>    | 1.5873 | <b>0.227</b>    |
| Chroma                      | 0.9059           | <b>-0.049</b>   | 1.9662 | <b>0.326</b>    | 1.755         | <b>0.274</b>    | 1.5788 | <b>0.224</b>    |
| Hue latitude                | 2.5152           | <b>0.431*</b>   | 1.2479 | <b>0.110243</b> | 0.7839        | <b>-0.121</b>   | 2.7232 | <b>0.463*</b>   |
| Hue longitude               | 8.7322           | <b>0.794***</b> | 4.8175 | <b>0.657***</b> | <b>0.9731</b> | <b>-0.014</b>   | 3.5525 | <b>0.561**</b>  |

\*\*\*\*)  $P < 0.001$ ; \*\*\*)  $P < 0.01$ ; (\*)  $P < 0.05$ ; (.)  $P < 0.1$

**Table 4:** ANOVA-derived Repeatabilities in 2010 plumage colouration measurements taken from live birds in the field, feather samples in the lab, and across both procedures (Only Visible part of the spectrum).

|                             | Visible range |                 |        |                 |        |                 |        |                 |
|-----------------------------|---------------|-----------------|--------|-----------------|--------|-----------------|--------|-----------------|
|                             | Belly         |                 | Breast |                 | Throat |                 | Vent   |                 |
|                             | F             | $r_i$           | F      | $r_i$           | F      | $r_i$           | F      | $r_i$           |
| <b>Repeatability field</b>  |               |                 |        |                 |        |                 |        |                 |
| Brightness                  | 14.408        | <b>0.817***</b> | 4.959  | <b>0.569***</b> | 16.59  | <b>0.839***</b> | 13.527 | <b>0.806***</b> |
| Chroma                      | 22.566        | <b>0.878***</b> | 22.163 | <b>0.876***</b> | 20.007 | <b>0.864***</b> | 7.8386 | <b>0.696***</b> |
| <b>Repeatability lab</b>    |               |                 |        |                 |        |                 |        |                 |
| Brightness                  | 59.713        | <b>0.951***</b> | 34.778 | <b>0.918***</b> | 34.133 | <b>0.917***</b> | 49.55  | <b>0.942***</b> |
| Chroma                      | 51.455        | <b>0.944***</b> | 57.897 | <b>0.950***</b> | 22.964 | <b>0.881***</b> | 72.314 | <b>0.959***</b> |
| <b>Comparison field-lab</b> |               |                 |        |                 |        |                 |        |                 |
| Brightness                  | 1.5559        | <b>0.217</b>    | 3.1819 | <b>0.522**</b>  | 0.679  | <b>-0.191</b>   | 2.3696 | <b>0.406.</b>   |
| Chroma                      | 7.0047        | <b>0.750***</b> | 7.0261 | <b>0.751***</b> | 1.0876 | <b>0.042</b>    | 2.4275 | <b>0.416*</b>   |

\*\*\*\*)  $P < 0.001$ ; \*\*\*)  $P < 0.01$ ; \*\*)  $P < 0.05$ ; \*)  $P < 0.1$

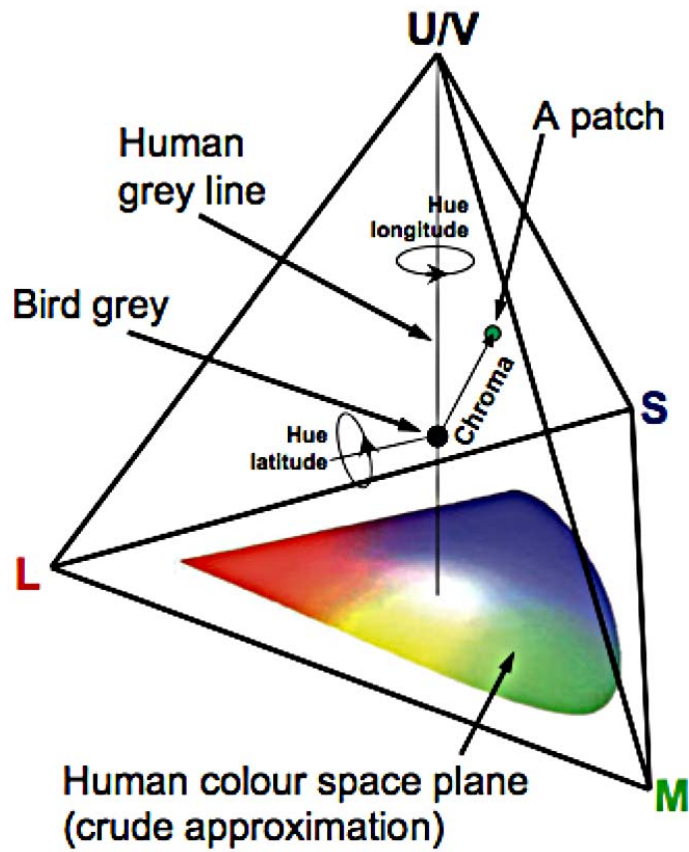

**Figure 1:** The avian tetrahedral colour space (from Endler and Mielke, 2005).



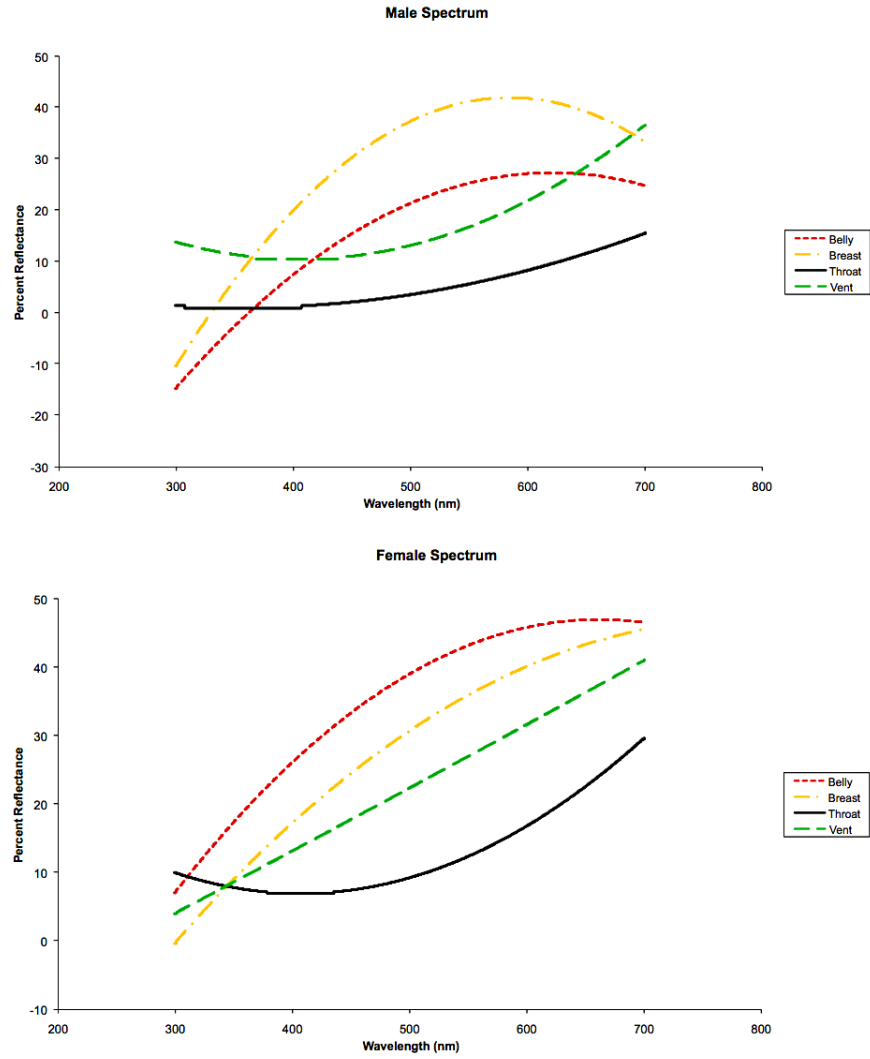

**Figure 2:** Reflectance spectra for belly, breast, throat and vent patches of male and female barn swallow (regression lines).

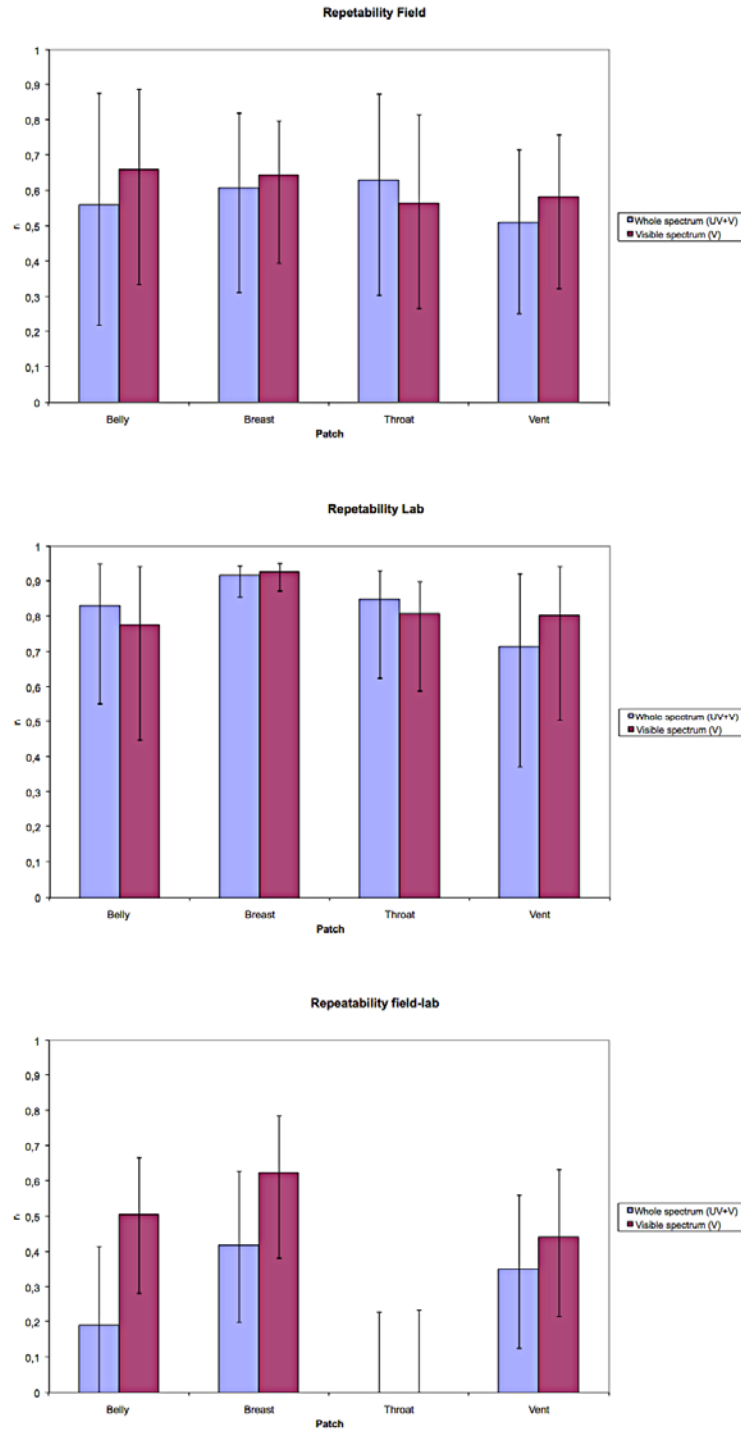

**Figure 3:** GLMM-derived repeatabilities ( $\pm$  95% CI) in 2009-2010 plumage colouration measurements taken a) from live birds in the field, b) from feather samples in the lab, and c) across both procedures, both when including the whole light spectrum or only the human-visible spectrum in the analyses.

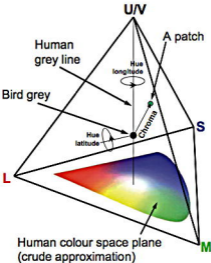

Male Spectrum

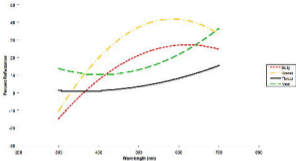

Female Spectrum

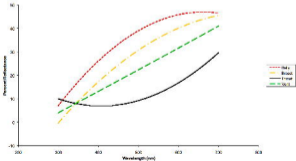

Repeatability Field

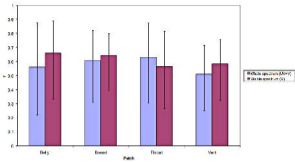

Repeatability Lab

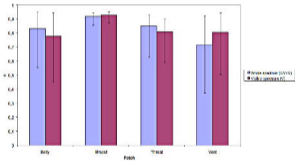

Repeatability TestLab

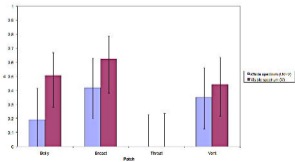

Source: https://www.biorxiv.org/content/biorxiv/early/2014/08/13/007914.full.pdf
